# Supplementary material for: Validation of the Oxford classification of IgA nephropathy in cohorts with different presentations and treatments
Source: PubMed Central journal article supplement — Kidney Int. 2014 Apr 2;86(4):828–36. doi: 10.1038/ki.2014.63 (PMC4184028; doi:10.1038/ki.2014.63), 2014-04-02
Supplement: ki201463x2.pdf [file ki201463x2.pdf]

Patients  
enrolled

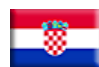

- **CROATIA:**  
15 Galesic-Galesic Ljubanovic ZAGREB

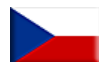

- **CZECH REPUBLIC:**  
104 Tesar-Honsova-Maixnerova PRAGUE

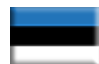

- **ESTONIA:**  
17 Rosenberg-Riispere TARTU

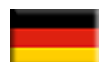

- **GERMANY:**  
7 Floege-Groene-Eitner AACHEN-HEIDELBERG

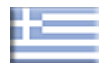

- **GREECE:**  
15 Goumenos-Kalliakmani-Gerolymos PATRAS  
18 Siamopoulos-Balafa IOANNINA  
16 Stangou THESSALONIKI

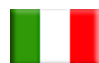

- **ITALY:**  
47 Beltrame-Mazzucco-Rollino TURIN  
11 Bergia-Mazzucco-Craverio BIELLA  
1 Boero-Mazzucco TURIN  
36 Cancarini-Tardanico-Ravera BRESCIA  
13 Cirami-Salvadori-Bertone FLORENCE  
52 Coppo-Mazzucco-Amore-Camilla TURIN  
7 Cusinato-Mazzucco-Benzozi BORGOMANERO  
5 Dal Canton-Esposito-Migotto PAVIA  
26 Di Giulio-Giannakakis ROME  
18 D'Amico-Ferrario COMO  
57 Emma-Giannakakis-Fuiano ROME  
35 Feriozzi-Giannakakis-Polci VITERBO  
11 Ferrario-Stellato MONZA  
20 Furci-Magistrone MODENA  
13 Galliani-Giannakakis ROME  
65 Gesualdo-Di Palma FOGGIA  
16 Giacchino-Mazzucco IVREA  
25 Locatelli-Del Vecchio-Casartelli LECCO  
8 Lupo-Bernich VERONA  
18 Maggio-Ferrario LODI  
4 Martina-Messuerotti-Mazzucco CHIVASSO  
7 Menè-Stoppacciaro ROME  
32 Moggia-Mazzucco-Fortunato CUNEO  
7 Morosetti-Giannakakis ROME  
36 Pani-Asunis-Angioi-Piras CAGLIARI

Patients  
enrolled

- 4 Pozzi-Ferrario CINISELLO B.
- 26 Pugliese-Giannakakis ROME
- 5 Savoldi-Mazzucco-Licata CIRIE'
- 35 Segoloni-Mazzucco-Colla TURIN
- 12 Stratta-Mazzucco-Quaglia NOVARA
- 3 Triolo-Mazzucco-Mariano TURIN

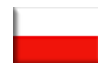

- **POLAND:**  
31 Durlik-Perkowska Ptasinska WARSAW  
18 Wiecek KATOWICE  
8 Mizerska Wasiak-Maldyk WARSAW

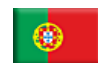

- **PORTUGAL:**  
19 Carvalho-da Costa Ferreira LISBON

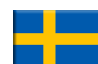

- **SWEDEN:**  
25 Berg-Soderberg HUDDINGE  
11 Fellstrom-Kloster Smerud-Sundelin UPPSALA  
72 Lundberg-Sundelin STOCKHOLM

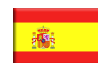

- **SPAIN:**  
30 Ballarin-Arce Terroba BARCELONA  
14 Egido-Cannata Ortiz-Catalina Martin MADRID  
6 Grinyo-Fulladosa Olivares BARCELONA  
40 Praga-Gutierrez MADRID

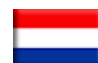

- **THE NETHERLANDS:**  
11 van Kooten-Rabelink-Reinders-Bajema-Bruijn LEIDEN  
24 Wetzels-Steenberger-Peters NIJMEGEN

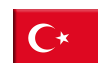

- **TURKEY:**  
25 Caliskan-Ozluk-Kilicaslan ISTANBUL  
17 Topaloglu-Orhan-Bilginer ANKARA

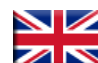

- **UNITED KINGDOM:**  
38 Feehally-Barratt LEICESTER  
13 Geddes-Kipgen GLASGOW
