# Supplementary figures and images for: Validation of the Oxford classification of IgA nephropathy in cohorts with different presentations and treatments
Source: PubMed Central journal article supplement — Kidney Int. 2014 Apr 2;86(4):828–36. doi: 10.1038/ki.2014.63 (PMC4184028; doi:10.1038/ki.2014.63), 2014-04-02

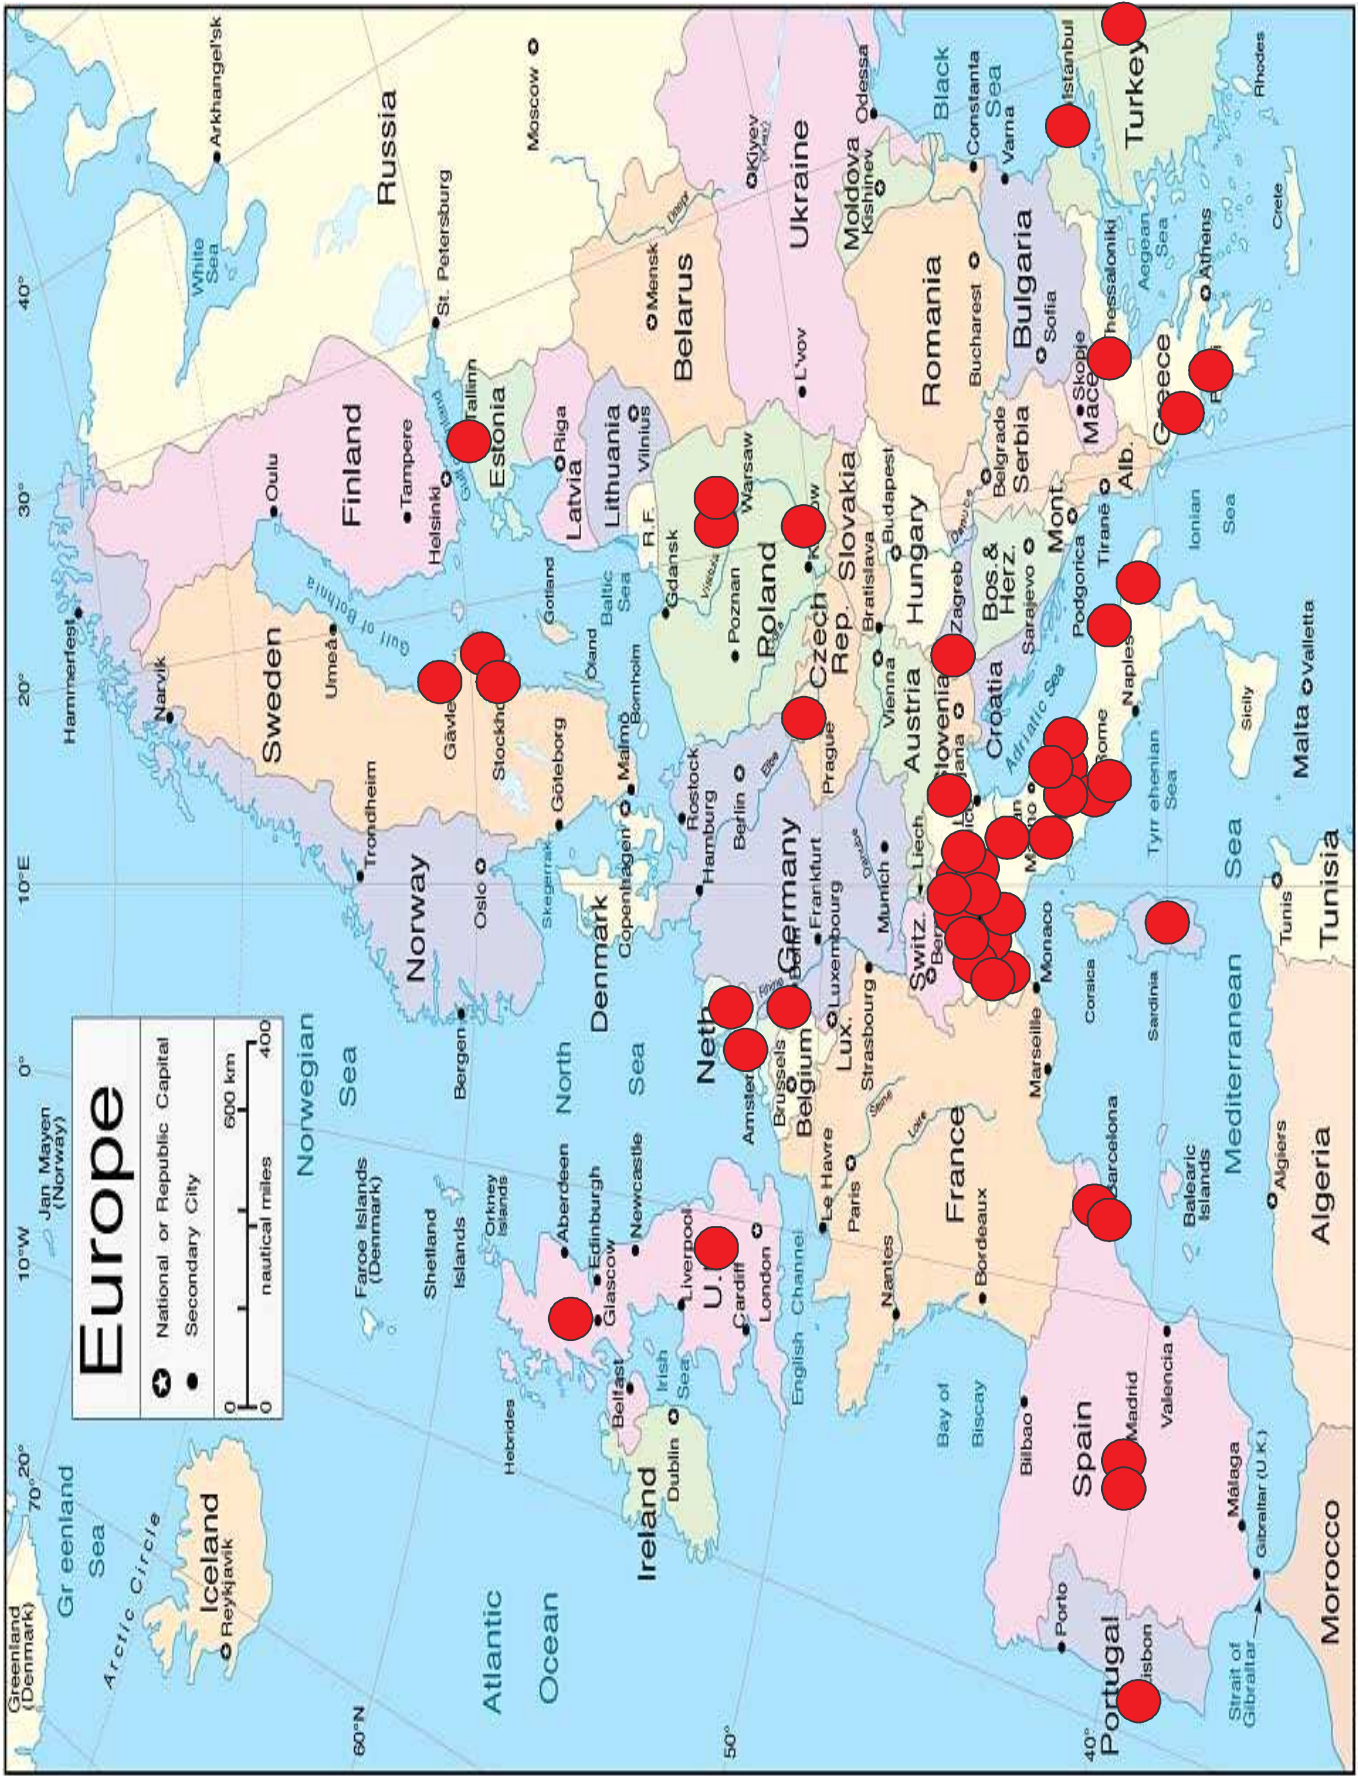

Supplement: ki201463x1.pdf [file ki201463x1.pdf]
